# Supplementary material for: Humidity influence on mechanics of paper materials: joint numerical and experimental study on fiber and fiber network scale
Source: Springer Nature journal article supplement (doi:10.1007/s10570-021-04355-y), 2021-12-11
Supplement: MOESM1 [file 19951828]

## Supplementary Information

# Humidity Influence on Mechanics and Failure of Paper Materials: Joint Numerical and Experimental Study on Fiber and Fiber Network Scale

Binbin Lin<sup>a,\*</sup>, Julia Auernhammer<sup>b</sup>, Jan-Lukas Schäfer<sup>c</sup>, Robert Stark<sup>b</sup>, Tobias Meckel<sup>c</sup>, Markus Biesalski<sup>c</sup>,  
Bai-Xiang Xu<sup>a,\*\*</sup>

<sup>a</sup>*Mechanics of Functional Materials Division, Institute of Materials Science, Technische Universität Darmstadt, Darmstadt 64287, Germany*

<sup>b</sup>*Physics of Surfaces, Institute of Materials Science, Technische Universität Darmstadt, Alarich-Weiss-Str. 16, 64287 Darmstadt, Germany*

<sup>c</sup>*Department of Chemistry, Macromolecular Chemistry and Paper Chemistry, Technische Universität Darmstadt, Alarich-Weiss-Str. 8, 64287 Darmstadt, Germany*

---

### Mesh Convergence study

In the following, we provide the details on how the mesh has been chosen: Generally, we used the commercial software Geodict to create the fiber network structure. The fiber network was generated based on the voxel geometry and a surface mesh was afterwards created based on that. Upon initialization, voxel size of one micron was chosen. Then as the surface mesh was being created, coarsening procedure was performed with 25, 50, 75 and 100 percent of the initial surface mesh size. The surface mesh was then meshed to volume mesh using the open source meshing software Gmsh. We demonstrate how the mesh size was determined based on separation of a fiber/fiber cross sample (similar as in [1]), in order to determine the number of planar cohesive zone elements and element number needed to ensure the result. The four different degree of discretization are shown including their contact area with planar cohesive zone elements in figure S1. FE-simulation were then performed and their corresponding force-displacement curve plotted in figure S2. Table S1 shows the corresponding number of planar and volume element as well the mechanical properties considered with their relative error in comparison with the highest mesh density. The highlighted rows show the mesh results with relative errors smaller than 1 percent for all properties. This degree of mesh density and the corresponding element numbers needed were then chosen for all fiber networks.

---

\*Corresponding author

\*\*Principal corresponding author

*Email addresses:* b.lin@mfm.tu-darmstadt.de (Binbin Lin), xu@mfm.tu-darmstadt.de (Bai-Xiang Xu)

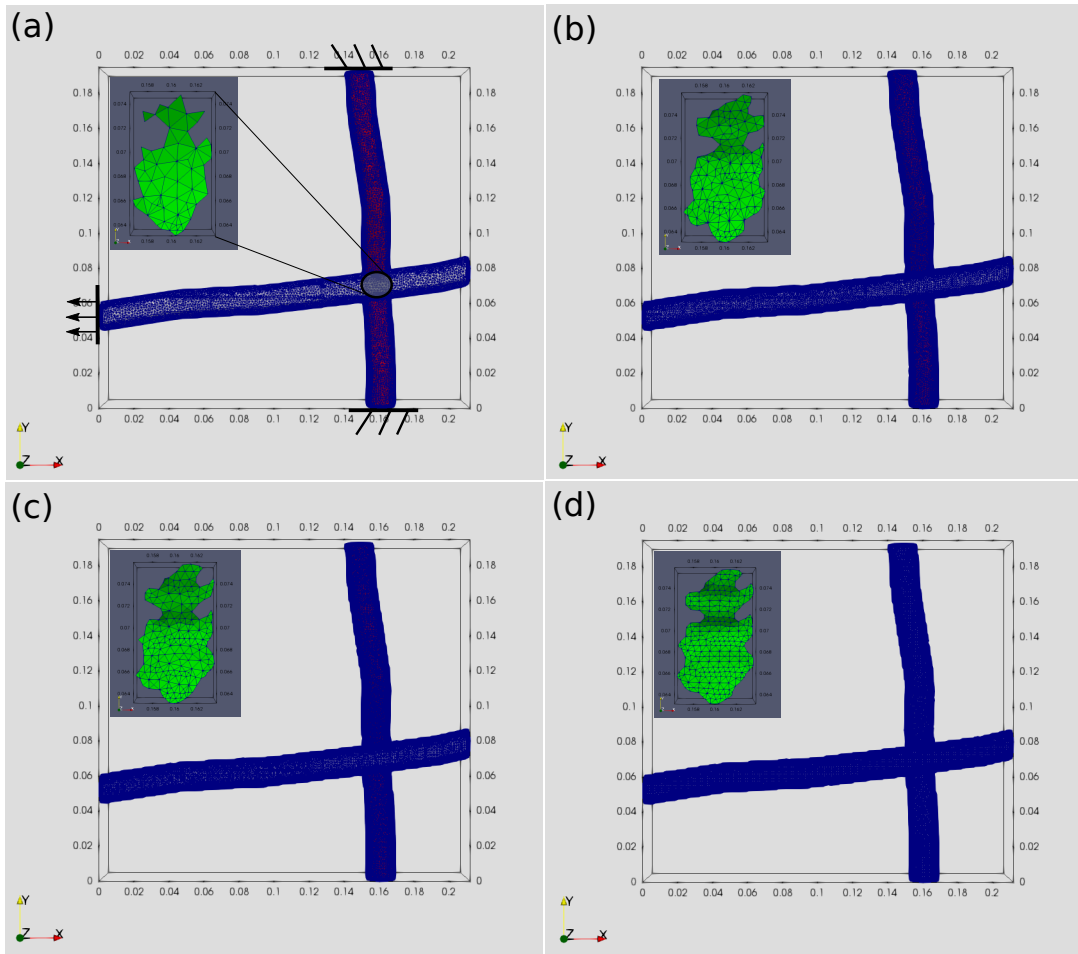

Fig. S1. Mesh discretization

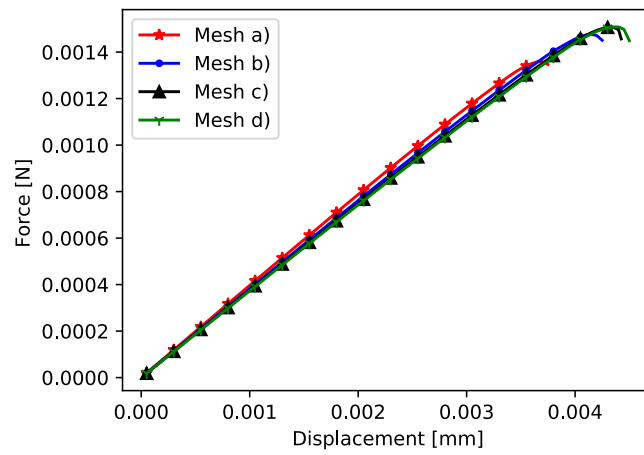

Fig. S2. F-D curve of the considered mesh sizes

**Table S1.** Result mesh convergence study

| Mesh | Nr. of CZM-elements for the fiber cross sample | Nr. of 3D volume elements for the fiber cross sample | True area per CZM-element [ $\mu\text{m}^2$ ] | 3D volume element per fiber of length [300 $\mu\text{m}$ ] | CZM-elements per fibernetwork with total area of approx. 0.1 $\text{mm}^2$ | 3D element per fibernetwork with approx. 40 fibers |
|------|------------------------------------------------|------------------------------------------------------|-----------------------------------------------|------------------------------------------------------------|----------------------------------------------------------------------------|----------------------------------------------------|
| a)   | 80                                             | 4436                                                 | 0.65                                          | 3327                                                       | 15385                                                                      | 133096                                             |
| b)   | 266                                            | 12776                                                | 0.25                                          | 9582                                                       | 40000                                                                      | 383300                                             |
| c)   | 324                                            | 35022                                                | 0.21                                          | 26267                                                      | 47619                                                                      | 1050680                                            |
| d)   | 476                                            | 60373                                                | 0.15                                          | 45280                                                      | 66666                                                                      | 1811200                                            |
| Mesh | Force at rupture [N]                           | rel. error [%]                                       | Displacement to force at rupture [mm]         | rel. error [%]                                             | Stiffness [N/mm]                                                           | rel. error [%]                                     |
| a)   | 0.001359                                       | 9.9                                                  | 0.0037                                        | 14.94                                                      | 0.3976                                                                     | 6.80                                               |
| b)   | 0.001477                                       | 2.08                                                 | 0.00415                                       | 4.59                                                       | 0.3822                                                                     | 2.65                                               |
| c)   | 0.001507                                       | 0.09                                                 | 0.00435                                       | 0                                                          | 0.3754                                                                     | 0.82                                               |
| d)   | 0.001508                                       | 0                                                    | 0.00435                                       | 0                                                          | 0.3722                                                                     | 0                                                  |

## References

- [1] Kulachenko, A. & Uesaka, T. Direct simulations of fiber network deformation and failure. *Mechanics of Materials* **51**, 1–14 (2012).
